# Supplementary material for: Application of a Bayesian ordinal animal model for the estimation of breeding values for the resistance to Monilinia fruticola (G.Winter) Honey in progenies of peach [Prunus persica (L.) Batsch]
Source: PubMed Central journal article supplement — Breed Sci. 2017 Feb 2;67(2):110–22. doi: 10.1270/jsbbs.16027 (PMC5445959; doi:10.1270/jsbbs.16027), 2017-02-02
Supplement: 67_16027_1.pdf [file 67_16027_1.pdf]

**Supplemental code 1. BOAM\_R+JAGS\_code.docx. R script with the sample code to run JAGS and R routines to perform the Bayesian Ordinal Animal Model**

```
# Bayesian Animal Models for Brown Rot Susceptibility in Peach, using an
Ordered Logistic Model

setwd("~/BOAM_BR/") # setting working directory
library(rjags)
dat <- read.delim("BR_NomOrd.txt", header=TRUE, stringsAsFactors = FALSE,
na.strings = "NA", strip.white = TRUE)

# names(dat)

set.seed(100307) # Setting a seed for same random number generation

# Giving name to the data to use in JAGS
Ntrees <- length(unique(dat$anim)) # number of trees
nrec <- length(dat[,1]) # count size of data set
y <- dat$BRSuc
ncat <- max(y, na.rm=T)
ncat1 <- ncat - 1
sq_D <- dat$Sq_D # Mendelian sampling term
pid <- dat$sire # father tree ID
sid <- dat$dam # mother tree ID
id <- dat$animal # tree ID
trt <- dat$Treatment # effect of treatment
yr <- dat$Year # effect of year (it is being imputed in JAGS for NAs)

# Building the data file for JAGS as usual, normal for var.a and everything
else
jag.dat <- list("id"=id, "sid"=sid, "pid"=pid, "sq_D"=sq_D, "nrec"=nrec,
"ncat"=ncat, "ncat1"=ncat1, "Ntrees"=Ntrees, "y"=y, "trt"=trt, "yr"=yr)
inits <- list("b.tr"=c(NA,0.1), "b.yr"=c(NA,0.1,-0.1), "alpha"=c(-
0.5,0,0.5,1)) # alpha must have ncat - 1 elements

cat(
"# Program for the Bayesian Animal Model (applied to peaches) using
dcat()
# Brown Rot Suceptibility (BRSuc) in fruits
# Pedigree of 221 trees (Ntrees), 1034 observations (nrec)
# Treatments: 1 and 2 (non-wounded and wounded); Years: 1,2 and 3 (2007,
2008 and 2009)
# Very unbalanced dataset, several NA in covariates for trees upstream of
pedigree
# Year will be imputed.
# This is an application of the Ordered Logistic Model with 5 categories:
1,2,3,4,5,
# meaning: resistant, tolerant, low tolerant, susceptible and highly
susceptible
# Missing data for years

#Specification of the reparameterized sampling distribution

model{

# Loop for pyear, one vector for levels of the missing covariate (3).
# We use dcat to randomly generate a year class (2 or 3, since year 1 =
0; with equal frequencies).

for(y in 1:3){
```

```

pyear[y] <- 1/3
}

# Generating year class
for (i in 1:nrec){
yr[i] ~ dcat(pyear[])
}
# Likelihood
for (i in 1:nrec){
for (j in 1:ncat1){
logit(theta[i,j]) <- alpha.s[j] - mu[i]
}
}
y[i] ~ dcat(p[i,1:ncat])

p[i,1]<- theta[i,1]
for(k in 2:ncat1){
p[i,k] <- theta[i,k] - theta[i,k-1]
} # end of k loop
p[i,ncat] <- 1-theta[i,ncat1]

mu[i] <- b.tr[trt[id[i]]] + b.yr[yr[id[i]]] + v[id[i]]*tau.a
v[i] <- tree[id[i]] * sq_D[id[i]] + ((v[pid[id[i]]] + v[sid[id[i]]])/2)
rr[i] <- (y[i] - mu[i])^2
}

# Phantom tree parents breeding values
v[1035] <- 0.0
v[1036] <- 0.0

# Randoms effect for each tree
for(j in 1:Ntrees){
tree[j] ~ dnorm(0.0,1.0) # a standard normal
}

# Priors
for (f in 1:ncat1) {
alpha[f] ~ dnorm(0,1.0E-3)
} # end of f loop
alpha.s[1:ncat1] <- sort(alpha)
normal ~ dnorm(0,1.0E-3)
tau.a <- abs(normal) #Normal
b.tr[1] <- 0.0
b.tr[2] ~ dnorm(0,1.0E-3)
b.yr[1] <- 0.0
for(j in 2:3){
b.yr[j] ~ dnorm(0,1.0E-3)
} # end of j loop

# Calculating the additive genetic variance
var.a <- log(tau.a)^2 # Additive genetic variance

# Breeding Values
for(k in 1:Ntrees){
EBV[k] <- v[k]*(tau.a)
}

# Heritability
h2 <- var.a/(var.a^2+((3.1416^2/3))

} # end of model loop"

```

```

, file="BOAM_Ordnormal.jag")

mod.JAGSn <- jags.model(file="BOAM_Ordnormal.jag", data=jag.dat,
inits=inits, n.chains=3)
update(mod.JAGSn,10000)
par.monm <- c("var.a","var.e","var.p","EBV","h2","b.tr","b.yr","alpha")
post.sampn <- coda.samples(mod.JAGSn,par.monm,n.iter=170000)
subsampn <- window(post.sampn,start=20001,end=170000, thin=30)
summary(subsampn)
BVsn<-summary(subsampn)
dic.pDn <- dic.samples(mod.JAGSn, 1000, "pD") # Deviance Information
Criterion
dic.poptn <- dic.samples(mod.JAGSn, 1000, "popt") # Penalized expected
deviance

# Convergence Diagnostics Plots
#plot(subsampn)
trcdenn<-plot(subsampn[,231:234]) # Heritability, var.a, var.e and var.p
#autocorrn.plot(subsampn)
autcorn<-autocorr.plot(subsampn[,231:234]) # Heritability, var.a, var.e and
var.p
#gelman.plot(subsampn)
gplotn<-gelman.plot(subsampn[,231:234]) # Heritability, var.a, var.e and
var.p
# Tabular diagnostics
#gelman.diag(subsampn, confidence=0.95, multivariate=TRUE) # Above is 1.1
bad
gelman.diag(subsampn[,231:234], confidence=0.95, multivariate=TRUE) # Above
1.1 is bad
#raftery.diag(subsampn, q = 0.025, r = 0.005, s = 0.95, converge.eps=0.001)
# Above 5 is bad
raftery.diag(subsampn[,231:234], q = 0.025, r = 0.005, s = 0.95,
converge.eps=0.001) # Above 5 is bad
#heidel.diag(subsampn)
heidel.diag(subsampn[,231:234])

# Building the data file for JAGS as usual, gamma for var.a and normal
everything else
jag.dat <- list("id"=id, "sid"=sid, "pid"=pid, "sq_D"=sq_D,"nrec"=nrec,
"ncat"=ncat, "ncat1"=ncat1, "Ntrees"=Ntrees, "y"=y,"trt"=trt, "yr"=yr)
inits <- list("b.tr"=c(NA,0.1), "b.yr"=c(NA,0.1,-0.1), "alpha" = c(-
0.5,0,0.5,1)) # alpha must have ncat - 1 elements

cat(
"# Program for the Bayesian Animal Model (applied to peaches) using
dcat()
# Brown Rot Suceptibility (BRSuc) in fruits
# Pedigree of 221 trees (Ntrees), 1034 observations (nrec)
# Treatments: 1 and 2 (non-wounded and wounded); Years: 1,2 and 3 (2007,
2008 and 2009)
# Very unbalanced dataset, several NA in covariates for trees upstream of
pedigree
# Year will be imputed.
# This is an application of the Ordered Logistic Model with 5 categories:
1,2,3,4,5,
# meaning: resistant, tolerant, low tolerant, susceptible and highly
susceptible
# Missing data for years

# Specification of the reparameterized sampling distribution

```

```

model{

  # Loop for pyear, one vector for levels of the missing covariate (3).
  # We use dcat to randomly generate a year class (2 or 3, since year 1 =
0; with equal frequencies).

  for(y in 1:3){
    pyear[y] <- 1/3
  }

  # Generating year class
  for (i in 1:nrec){
    yr[i] ~ dcat(pyear[])
  }
  # Likelihood
  for (i in 1:nrec){
    for (j in 1:ncat1){
      logit(theta[i,j]) <- alpha.s[j] - mu[i]
    }
    y[i] ~ dcat(p[i,1:ncat])

    p[i,1]<- theta[i,1]
    for(k in 2:ncat1){
      p[i,k] <- theta[i,k] - theta[i,k-1]
    } # end of k loop
    p[i,ncat] <- 1-theta[i,ncat1]

    mu[i] <- b.tr[trt[id[i]]] + b.yr[yr[id[i]]] + v[id[i]]*tau.a
    v[i] <- tree[id[i]] * sq_D[id[i]] + ((v[pid[id[i]]] + v[sid[id[i]]])/2)
    rr[i] <- (y[i] - mu[i])^2
  }

  # Phantom tree parents breeding values
  v[1035] <- 0.0
  v[1036] <- 0.0

  # Randoms effect for each tree
  for(j in 1:Ntrees){
    tree[j] ~ dnorm(0.0,1.0) # a standard normal
  }

  # Priors
  for (f in 1:ncat1) {
    alpha[f] ~ dnorm(0,1.0E-3)
  } # end of f loop
  alpha.s[1:ncat1] <- sort(alpha)
  tau.a ~ dgamma(0.001,0.001) #gamma
  b.tr[1] <- 0.0
  b.tr[2] ~ dnorm(0,1.0E-3)
  b.yr[1] <- 0.0
  for(j in 2:3){
    b.yr[j] ~ dnorm(0,1.0E-3)
  } # end of j loop

  # Calculating the additive genetic variance
  var.a <- log(tau.a)^2 # Additive genetic variance

  # Breeding Values
  for(k in 1:Ntrees){

```

```

EBV[k] <- v[k]*(tau.a)
}

# Heritability
h2 <- var.a/(var.a^2+((3.1416^2/3))

} # end of model loop"
, file="BOAM_Ordgamma.jag")

mod.JAGSg <- jags.model(file="BRAM_Ordgamma.jag", data=jag.dat, inits=inits,
n.chains=3)
update(mod.JAGSg,10000)
par.mong <- c("var.a", "var.e", "var.p", "EBV", "h2", "b.tr", "b.yr",
"alpha")
post.sampg <- coda.samples(mod.JAGSg,par.mong,n.iter=170000)
subsampg <- window(post.sampg,start=20001,end=170000, thin=30)
summary(subsampg)
BVsg<-summary(subsampg)
dic.pDg <- dic.samples(mod.JAGSg, 1000, "pD") # Deviance Information
Criterion
dic.poptg <- dic.samples(mod.JAGSg, 1000, "popt") # Penalized expected
deviance

# Convergence Diagnostics Plots
plot(subsampg)
trcdeng<-plot(subsampg[,231:234]) # Heritability, var.a, var.e and var.p
#autocorrplot(subsampg)
autcorg<-autocorr.plot(subsampg[,231:234]) # Heritability, var.a, var.e and
var.p
#gelman.plot(subsampg)
gplotg<-gelman.plot(subsampg[,231:234]) # Heritability, var.a, var.e and
var.p
# Tabular diagnostics
#gelman.diag(subsampg, confidence=0.95, multivariate=TRUE) # Above is 1.1 bad
gelman.diag(subsampg[,231:234], confidence=0.95, multivariate=TRUE) # Above
1.1 is bad
#raftery.diag(subsampg, q = 0.025, r = 0.005, s = 0.95, converge.eps=0.001) #
Above 5 is bad
raftery.diag(subsampg[,231:234], q = 0.025, r = 0.005, s = 0.95,
converge.eps=0.001) # Above 5 is bad
#heidel.diag(subsampg)
heidel.diag(subsampg[,231:234])

# Building the data file for JAGS as usual, Half-Cauchy for var.a and
normal for everything else
jag.dat <- list("id"=id, "sid"=sid, "pid"=pid, "sq_D"=sq_D,
"nrec"=nrec,"ncat"=ncat, "ncat1"=ncat1, "Ntrees"=Ntrees, "y"=y, "trt"=trt,
"yr"=yr)
inits <- list("b.tr"=c(NA,0.1), "b.yr"=c(NA,0.1,-0.1), "alpha" = c(-
0.5,0,0.5,1)) # alpha must have ncat - 1 elements

cat(
"# Program for the Bayesian Animal Model (applied to peaches) using
dcat()
# Brown Rot Suceptibility (BRSuc) in fruits
# Pedigree of 221 trees (Ntrees), 1034 observations (nrec)
# Treatments: 1 and 2 (non-wounded and wounded); Years: 1,2 and 3 (2007,
2008 and 2009)

```

```

# Very unbalanced dataset, several NA in covariates for trees upstream of
pedigree
# Year will be imputed.
# This is an application of the Ordered Logistic Model with 5 categories:
1,2,3,4,5,
# meaning: resistant, tolerant, low tolerant, susceptible and highly
susceptible
# Missing data for years

#Specification of the reparameterized sampling distribution

model{

# Loop for pyear, one vector for levels of the missing covariate (3).
# We use dcat to randomly generate a year class (2 or 3, since year 1 =
0; with equal frequencies).

for(y in 1:3){
pyear[y] <- 1/3
}

# Generating year class
for (i in 1:nrec){
yr[i] ~ dcat(pyear[])
}
# Likelihood
for (i in 1:nrec){
for (j in 1:ncat1){
logit(theta[i,j]) <- alpha.s[j] - mu[i]
}
y[i] ~ dcat(p[i,1:ncat])

p[i,1]<- theta[i,1]
for(k in 2:ncat1){
p[i,k] <- theta[i,k] - theta[i,k-1]
} # end of k loop
p[i,ncat] <- 1-theta[i,ncat1]

mu[i] <- b.tr[trt[id[i]]] + b.yr[yr[id[i]]] + v[id[i]]*tau.a
v[i] <- tree[id[i]] * sq_D[id[i]] + ((v[pid[id[i]]] + v[sid[id[i]]])/2)
rr[i] <- (y[i] - mu[i])^2
}

# Phantom tree parents breeding values
v[1035] <- 0.0
v[1036] <- 0.0

# Randoms effect for each tree
for(j in 1:Ntrees){
tree[j] ~ dnorm(0.0,1.0) # a standard normal
}

# Priors
for (f in 1:ncat1) {
alpha[f] ~ dnorm(0,1.0E-3)
} # end of f loop
alpha.s[1:ncat1] <- sort(alpha)
cauchy ~ dt(0,1,1)
tau.a <- abs(cauchy) #half-Cauchy
b.tr[1] <- 0.0

```

```

b.tr[2] ~ dnorm(0,1.0E-3)
b.yr[1] <- 0.0
for(j in 2:3){
b.yr[j] ~ dnorm(0,1.0E-3)
} # end of j loop

# Calculating the additive genetic variance
var.a <- log(tau.a)^2 # Additive genetic variance

# Breeding Values
for(k in 1:Ntrees){
EBV[k] <- v[k]*(tau.a)
}

# Heritability
h2 <- var.a/(var.a^2+((3.1416^2/3))

} # end of model loop"
, file="BOAM_Ordcauchy.jag")

mod.JAGSc <- jags.model(file="BOAM_Ordcauchy.jag", data=jag.dat,
inits=inits, n.chains=3)
update(mod.JAGSc,10000)
par.monc <- c("var.a","var.e","var.p","EBV","h2","b.tr","b.yr","alpha")
post.sampc <- coda.samples(mod.JAGSc,par.monc,n.iter=170000)
subsampc <- window(post.sampc,start=20001,end=170000, thin=30)
summary(subsampc)
BVsc<-summary(subsampc)
dic.pDc <- dic.samples(mod.JAGSc, 1000, "pD") # Deviance Information
Criterion
dic.poptc <- dic.samples(mod.JAGSc, 1000, "popt") # Penalized expected
deviance

# Convergence Diagnostics Plots
#plot(subsampc)
trcdenc<-plot(subsampc[,231:234]) # Heritability, var.a, var.e and var.p
#autocorrn.plot(subsampc)
autcorc<-autocorr.plot(subsampc[,231:234]) # Heritability, var.a, var.e and
var.p
#gelman.plot(subsampc)
gplotc<-gelman.plot(subsampc[,231:234]) # Heritability, var.a, var.e and
var.p
# Tabular diagnostics
#gelman.diag(subsampc, confidence=0.95, multivariate=TRUE) # Above is 1.1
bad
gelman.diag(subsampc[,231:234], confidence=0.95, multivariate=TRUE) # Above
1.1 is bad
#raftery.diag(subsampc, q = 0.025, r = 0.005, s = 0.95, converge.eps=0.001)
# Above 5 is bad
raftery.diag(subsampc[,231:234], q = 0.025, r = 0.005, s = 0.95,
converge.eps=0.001) # Above 5 is bad
#heidel.diag(subsampc)
heidel.diag(subsampc[,231:234])

# Building the data file for JAGS as usual, uniform (1/sqrt(pi
squared/3)) for var.a and normal for everything else
jag.dat <- list("id"=id, "sid"=sid, "pid"=pid, "sq_D"=sq_D, "nrec"=nrec,
"ncat"=ncat, "ncat1"=ncat1, "Ntrees"=Ntrees, "y"=y, "trt"=trt, "yr"=yr)

```

```

inits <- list("b.tr"=c(NA,0.1), "b.yr"=c(NA,0.1,-0.1), "alpha" = c(-
0.5,0,0.5,1)) # alpha must have ncat - 1 elements

cat(
"# Program for the Bayesian Animal Model (applied to peaches) using
dcat()
# Brown Rot Suceptibility (BRSuc) in fruits
# Pedigree of 221 trees (Ntrees), 1034 observations (nrec)
# Treatments: 1 and 2 (non-wounded and wounded); Years: 1,2 and 3 (2007,
2008 and 2009)
# Very unbalanced dataset, several NA in covariates for trees upstream of
pedigree
# Year will be imputed.
# This is an application of the Ordered Logistic Model with 5 categories:
1,2,3,4,5,
# meaning: resistant, tolerant, low tolerant, susceptible and highly
susceptible
# Missing data for years

#Specification of the reparameterized sampling distribution

model{

# Loop for pyear, one vector for levels of the missing covariate (3).
# We use dcat to randomly generate a year class (2 or 3, since year 1 =
0; with equal frequencies).

for(y in 1:3){
  pyear[y] <- 1/3
}

# Generating year class
for (i in 1:nrec){
  yr[i] ~ dcat(pyear[])
}
# Likelihood
for (i in 1:nrec){
  for (j in 1:ncat1){
    logit(theta[i,j]) <- alpha.s[j] - mu[i]
  }
  y[i] ~ dcat(p[i,1:ncat])

  p[i,1]<- theta[i,1]
  for(k in 2:ncat1){
    p[i,k] <- theta[i,k] - theta[i,k-1]
  } # end of k loop
  p[i,ncat] <- 1-theta[i,ncat1]

  mu[i] <- b.tr[trt[id[i]]] + b.yr[yr[id[i]]] + v[id[i]]*tau.a
  v[i] <- tree[id[i]] * sq_D[id[i]] + ((v[pid[id[i]]] + v[sid[id[i]]])/2)
  rr[i] <- (y[i] - mu[i])^2
}

# Phantom tree parents breeding values
v[1035] <- 0.0
v[1036] <- 0.0

# Randoms effect for each tree
for(j in 1:Ntrees){
  tree[j] ~ dnorm(0.0,1.0) # a standard normal

```



```

}

# Priors
for (f in 1:ncat1) {
  alpha[f] ~ dnorm(0,1.0E-3)
} # end of f loop
alpha.s[1:ncat1] <- sort(alpha)
cauchy ~ dt(0,1,1)
tau.a <- abs(cauchy) #half-Cauchy
b.tr[1] <- 0.0
b.tr[2] ~ dnorm(0,1.0E-3)
b.yr[1] <- 0.0
for(j in 2:3){
  b.yr[j] ~ dnorm(0,1.0E-3)
} # end of j loop

# Calculating the additive genetic variance
var.a <- log(tau.a)^2 # Additive genetic variance

# Breeding Values
for(k in 1:Ntrees){
  EBV[k] <- v[k]*(tau.a)
}

# Heritability
h2 <- var.a/(var.a^2+((3.1416^2/3))

} # end of model loop"
, file="BOAM_Orduniform.jag")

mod.JAGSu <- jags.model(file="BOAM_Orduniform.jag", data=jag.dat,
inits=inits, n.chains=3)
update(mod.JAGSu,10000)
par.monu <- c("var.a", "var.e", "var.p", "EBV", "h2", "b.tr", "b.yr",
"alpha")
post.sampu <- coda.samples(mod.JAGSu,par.monu,n.iter=170000)
subsampu <- window(post.sampu,start=20001,end=170000, thin=30)
summary(subsampu)
BVsu<-summary(subsampu)
dic.pDu <- dic.samples(mod.JAGSu, 1000, "pD") # Deviance Information
Criterion
dic.poptu <- dic.samples(mod.JAGSu, 1000, "popt") # Penalized expected
deviance

# Convergence Diagnostics Plots
#plot(subsampu)
trcdenu<-plot(subsampu[,231:234]) # Heritability, var.a, var.e and var.p
#autocorrn.plot(subsampu)
autcoru<-autocorr.plot(subsampu[,231:234]) # Heritability, var.a, var.e and
var.p
#gelman.plot(subsampu)
gplotu<-gelman.plot(subsampu[,231:234]) # Heritability, var.a, var.e and
var.p
# Tabular diagnostics
#gelman.diag(subsampu, confidence=0.95, multivariate=TRUE) # Above is 1.1 bad
gelman.diag(subsampu[,231:234], confidence=0.95, multivariate=TRUE) # Above
1.1 is bad
#raftery.diag(subsampu, q = 0.025, r = 0.005, s = 0.95, converge.eps=0.001) #
Above 5 is bad

```

```
raftery.diag(subsampu[,231:234], q = 0.025, r = 0.005, s = 0.95,
converge.eps=0.001) # Above 5 is bad
#heidel.diag(subsampu)
heidel.diag(subsampc[,231:234])

# Comparing DIC among priors
diffdic(dic.pDn, dic.pDg) # For model comparison, if negative, normal is
better than gamma
diffdic(dic.pDn, dic.pDc) # For model comparison, if negative, normal is
better than cauchy
diffdic(dic.pDn, dic.pDu) # For model comparison, if negative, normal is
better than uniform
diffdic(dic.pDc, dic.pDg) # For model comparison, if negative, cauchy is
better than gamma
diffdic(dic.pDc, dic.pDu) # For model comparison, if negative, cauchy is
better than uniform
diffdic(dic.pDg, dic.pDu) # For model comparison, if negative, gamma is
better than uniform

save.image("BOAM.RData")
```
